# Supplementary material for: Upcycling Rocha do Oeste Pear Pomace as a Sustainable Food Ingredient: Composition, Rheological Behavior and Microstructure Alone and Combined with Yeast Protein Extract
Source: MDPI journal article supplement (doi:10.3390/molecules28010179), 2022-12-25
Supplement: s1 [file s1]

**Upcycling Rocha do Oeste pear pomace as a sustainable food ingredient: composition, rheological behavior and microstructure alone and combined with yeast protein extract**

Ana Fernandes<sup>1\*</sup>, Sara Simões<sup>2</sup>, Isabel. M. P. L. V. O. Ferreira<sup>3</sup>, Maria João Alegria<sup>4</sup>,  
Nuno Mateus<sup>1</sup>, Anabela Raymundo<sup>2</sup>, and Victor de Freitas<sup>1</sup>

<sup>1</sup> LAQV/REQUIMTE, Departamento de Química e Bioquímica, Faculdade de Ciências, Universidade do Porto, Porto, Portugal.

<sup>2</sup> LEAF - Linking Landscape, Environment, Agriculture and Food Research Centre, Instituto Superior de Agronomia da Universidade de Lisboa, Lisboa, Portugal.

<sup>3</sup>LAQV/REQUIMTE, Laboratory of Bromatology and Hydrology, Pharmacy Faculty, Porto University, Portugal.

<sup>4</sup> SUMOL+COMPAL Marcas S.A., Carnaxide, Portugal.

\* Corresponding author. E-mail address: ana.fernandes@fc.up.pt (Ana Fernandes).

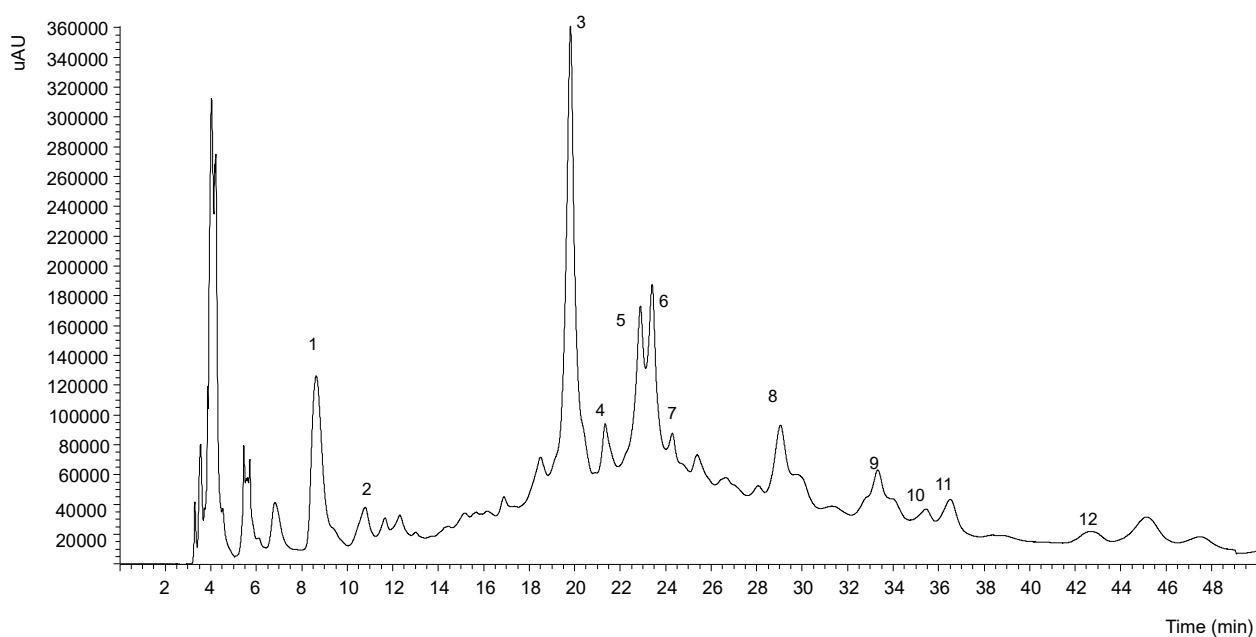

**Figure S1.** HPLC–DAD/ESI-MS chromatogram of extractable phenolic fraction (EF) obtained from pear pomace. Peak assignment based on mass parent ion ( $m/z$ ) and secondary ( $MS^2$  and  $MS^3$ ) fragment ions data. 1: quinic acid ( $m/z$  191); 2: arbutin ( $m/z$  271); 3: chlorogenic acid ( $m/z$  353); 4: dimeric procyanidin ( $m/z$  577); 5: caffeoylquinic acid ( $m/z$  353); 6: (-)-epicatechin ( $m/z$  289); 7: trimeric procyanidin ( $m/z$  865); 8: n.d.; 9: quercetin-3-*O*-rutinoside ( $m/z$  609); 10: quercetin-3-*O*-hexoside ( $m/z$  463); 11: quercetin-3-*O*-galactoside ( $m/z$  463); 12: isorhamnetin-3-*O*-rutinoside ( $m/z$  623).

Table S1. HPLC–DAD /ESI-MS profile of extractable phenolic fraction (EF) obtained from pear pomace.

| Peak number | RT (min) | $\lambda_{\text{max}}$ (nm) | [M-H] <sup>-</sup> | MS <sup>2</sup>     | MS <sup>3</sup>    | Tentative identification             |
|-------------|----------|-----------------------------|--------------------|---------------------|--------------------|--------------------------------------|
| 1           | 8.64     | 265                         | 191.1              | -                   | -                  | Quinic Acid                          |
| 2           | 10.79    | 292                         | 271.1              | -                   | -                  | Arbutin                              |
| 3           | 19.81    | 325                         | 353.3              | 191.1               | -                  | Chlorogenic acid                     |
| 4           | 21.34    | 280                         | 577.31             | 425.1; 407.2; 289.4 | 406.9              | Dimeric procyanidin                  |
| 5           | 22.88    | 283; 307                    | 353.3              | -                   | -                  | Caffeoyl-quinic acid                 |
| 6           | 23.4     | 280                         | 289.25             | -                   | -                  | (-)-epicatechin                      |
| 7           | 24.29    | 280                         | 865.24             | 695; 577; 289       | 542.9; 451.1; 407  | Trimeric procyanidin                 |
| 8           | 29.04    | 268                         | 739.04             | 586.73; 435; 289    | 407.1; 273.1       | unknown                              |
| 9           | 33.33    | 352                         | 609.31             | 301.3               | 178.91; 271.1; 151 | Quercetin-3- <i>O</i> -rutinoside    |
| 10          | 35.44    | 352                         | 463.5              | 301.1; 179          | 179                | Quercetin-3- <i>O</i> -hexoside      |
| 11          | 36.51    | 352                         | 463.2              | 301.2               | 179.17; 151.1      | Quercetin-3- <i>O</i> -galactoside   |
| 12          | 42.72    | 346                         | 623.15             | 314.9; 300          | 300                | Isorhamnetin-3- <i>O</i> -rutinoside |
